# Supplementary material
Source: PubMed Central journal article supplement (PMC3502626)

**Title:** Resveratrol Sensitizes AML Cells to HDAC Inhibitors via ROS-Mediated Activation of the Extrinsic Apoptotic Pathway

**Authors:** Alae Yaseen, Shuang Chen, Stefanie Hock, Roberto Rosato, Paul Dent, Yun Dai, Steven Grant

**Journal Title:** Molecular Pharmacology

**Supplemental Figure S1.** *Resveratrol interacts synergistically with HDAC inhibitors in human AML cells.* U937 cells were exposed to (A) 50  $\mu$ M resveratrol +/- 1.5  $\mu$ M vorinostat for 24 hr, after which the percentage of cell death was determined by 7AAD staining and flow cytometry. Values = the means  $\pm$  S.D. for triplicate determinations performed on three separate occasions (\*  $P < 0.05$ , \*\*  $P < 0.01$  vs. each agent alone). (B-D) U937 were treated with LBH-589 or vorinostat +/- resveratrol at a fixed ratio for 24 hr, after which apoptosis was monitored by annexin V/PI analysis (B), or DiOC<sub>6</sub> uptake (reflecting loss of mitochondrial membrane potential; C and D). An additional experiment yielded equivalent results.

Supplemental Figure S1

**A**

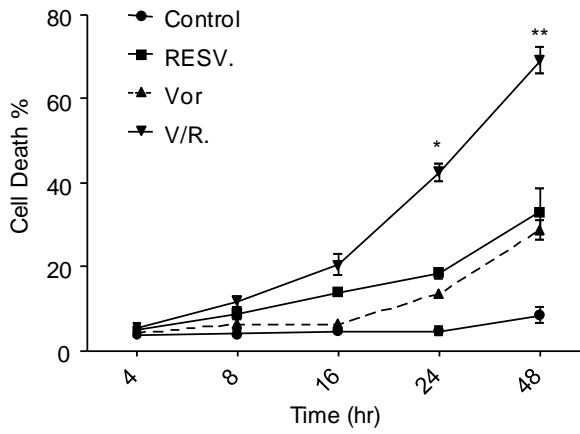

**B**

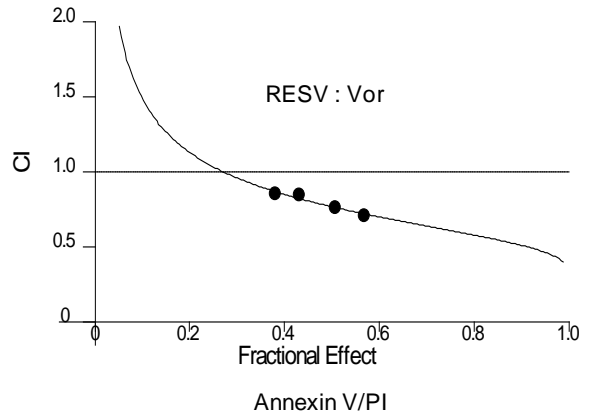

**C**

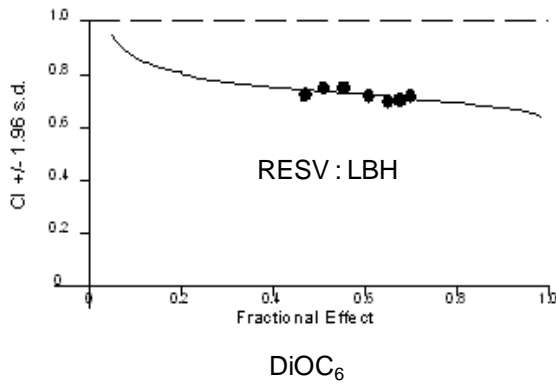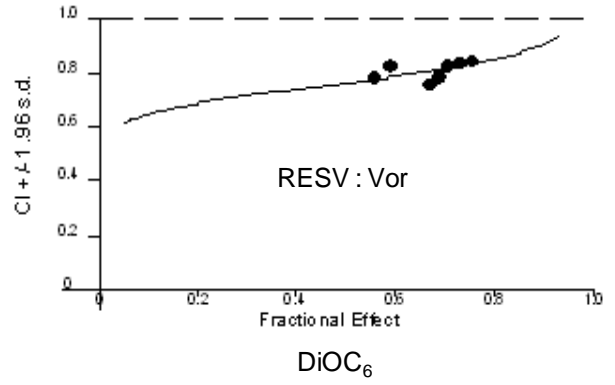

Supplement: supp_mol.112.079624_MOL79624Supplemental_data_1.pdf [file supp_mol.112.079624_MOL79624Supplemental_data_1.pdf]
