# Supplementary material
Source: PubMed Central journal article supplement (PMC3502626)

**Title:** Resveratrol Sensitizes AML Cells to HDAC Inhibitors via ROS-Mediated Activation of the Extrinsic Apoptotic Pathway

**Authors:** Alae Yaseen, Shuang Chen, Stefanie Hock, Roberto Rosato, Paul Dent, Yun Dai, Steven Grant

**Journal Title:** Molecular Pharmacology

**Supplemental Figure S2.** The ROS scavenger MnTBAP prevents mitochondrial injury and activation of the caspase cascade. (A-B) U937 cells were treated with 50  $\mu$ M resveratrol +/- 15 nM LBH-589 or 1.5  $\mu$ M vorinostat in the absence or presence of 400  $\mu$ M MnTBAP for 24 hr, after which loss of mitochondrial membrane potential (“low”  $\Delta\psi_m$ ) was determined by DiOC<sub>6</sub> staining and flow cytometry. Values = the means  $\pm$  S.D. for triplicate determinations performed on three separate occasions (\* P < 0.05, \*\* P < 0.01 vs. each agent alone). (B) Alternatively, cells were lysed and subjected to Western blot analysis to monitor cleavage of caspase-3 and PARP. Each lane was loaded with 30  $\mu$ g of protein; blots were stripped and re probed with  $\beta$ -actin to ensure equivalent loading and transfer. CF = cleaved fragment. (C) U937 cells were exposed to 50  $\mu$ M resveratrol +/- 1.5  $\mu$ M vorinostat for the indicated intervals, after which flow cytometry was performed to analyze cell cycle distribution after PI staining, and data was then quantified.

Supplemental Figure S2

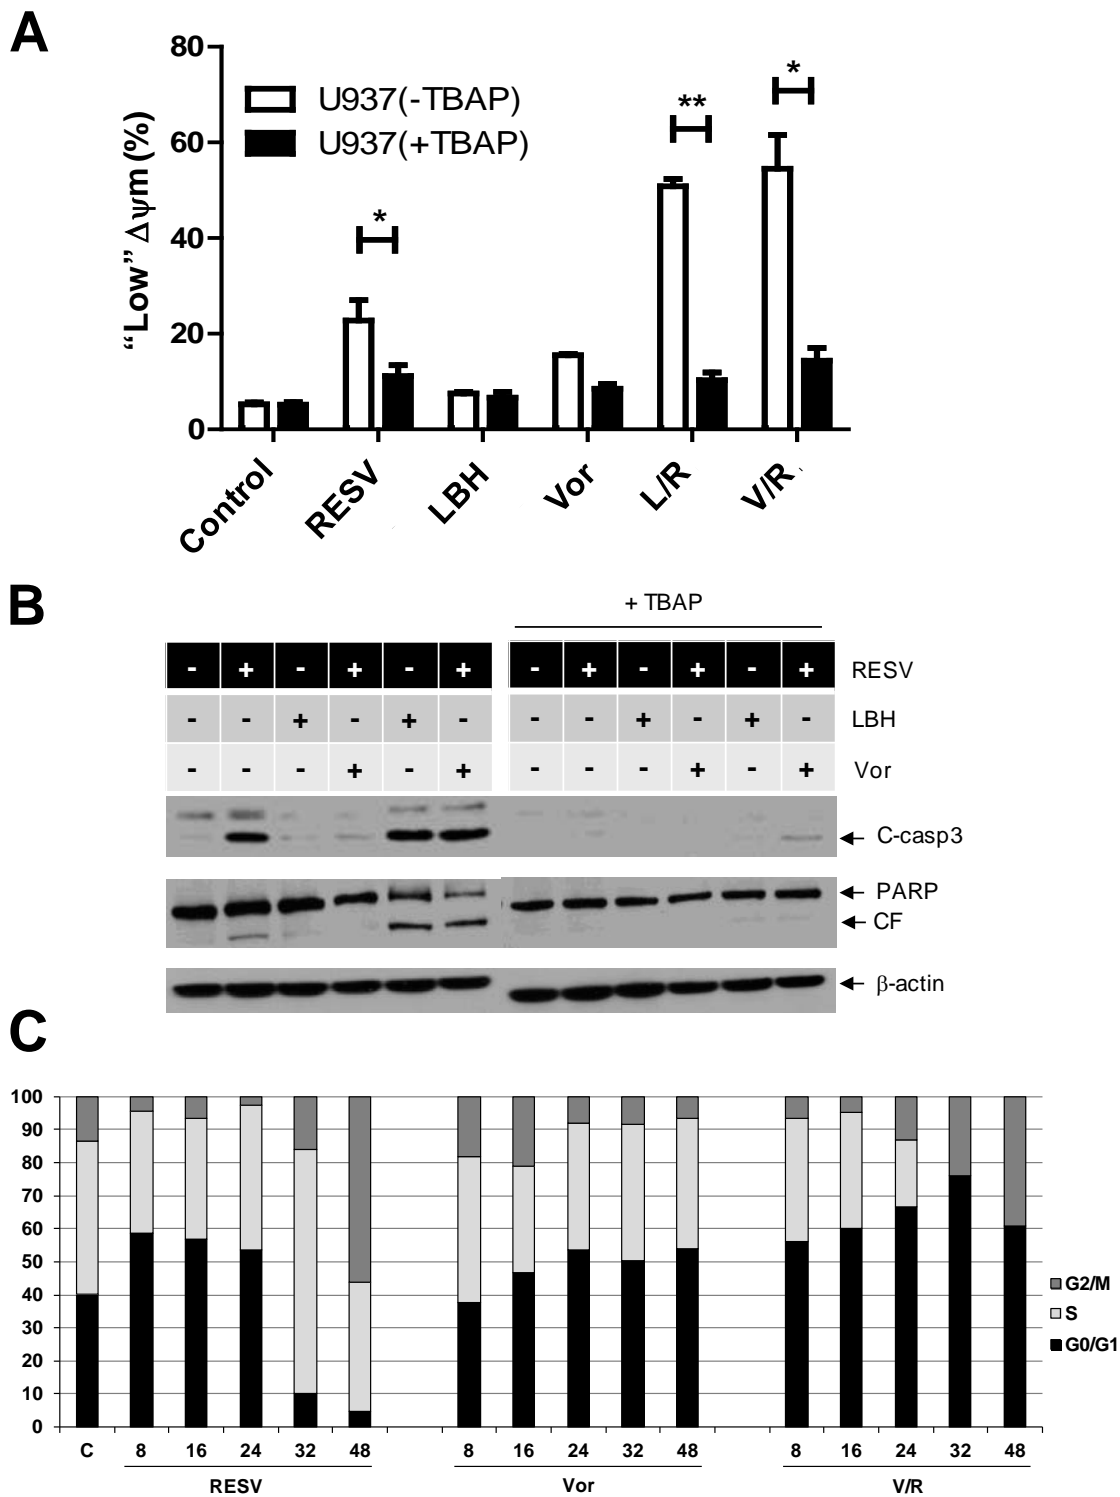

Supplement: supp_mol.112.079624_MOL79624Supplemental_data_2.pdf [file supp_mol.112.079624_MOL79624Supplemental_data_2.pdf]
